# Supplementary material
Source: PubMed Central journal article supplement (PMC545538)

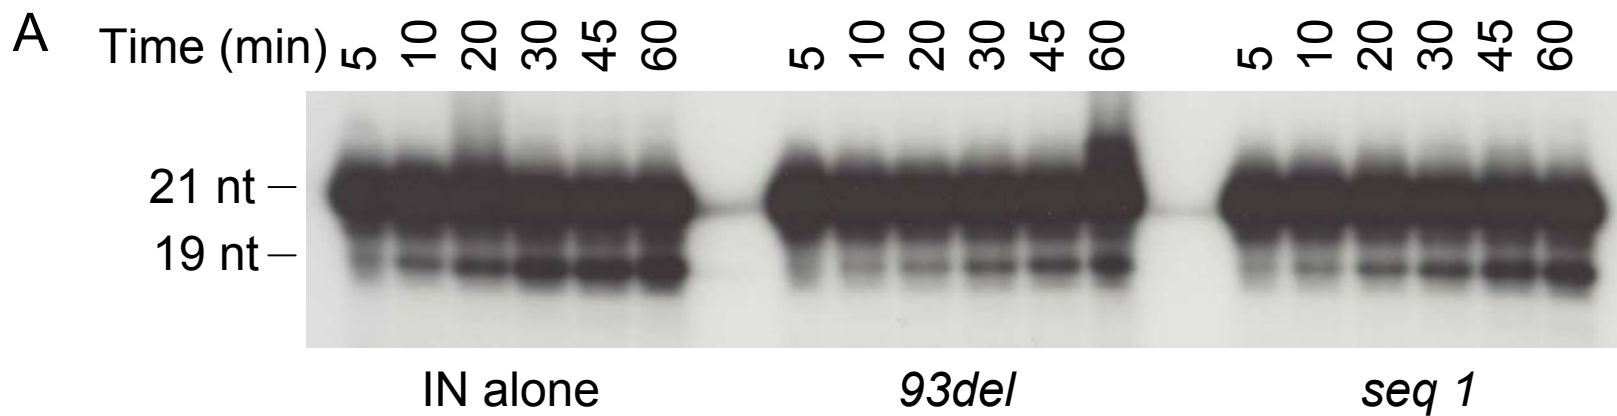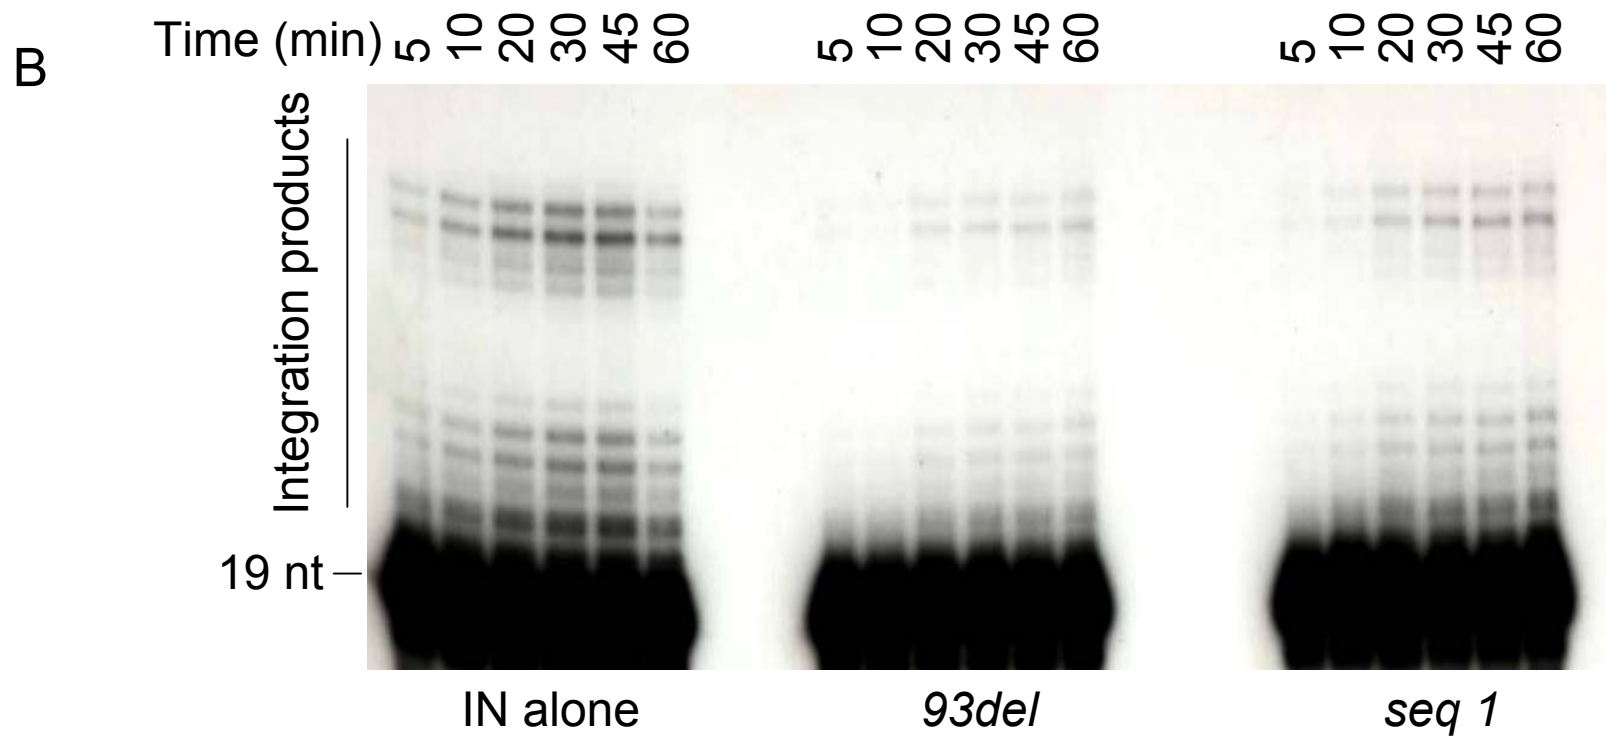

Supplement: pnas_102_3_634__10.pdf [file pnas_102_3_634__10.pdf]

**A**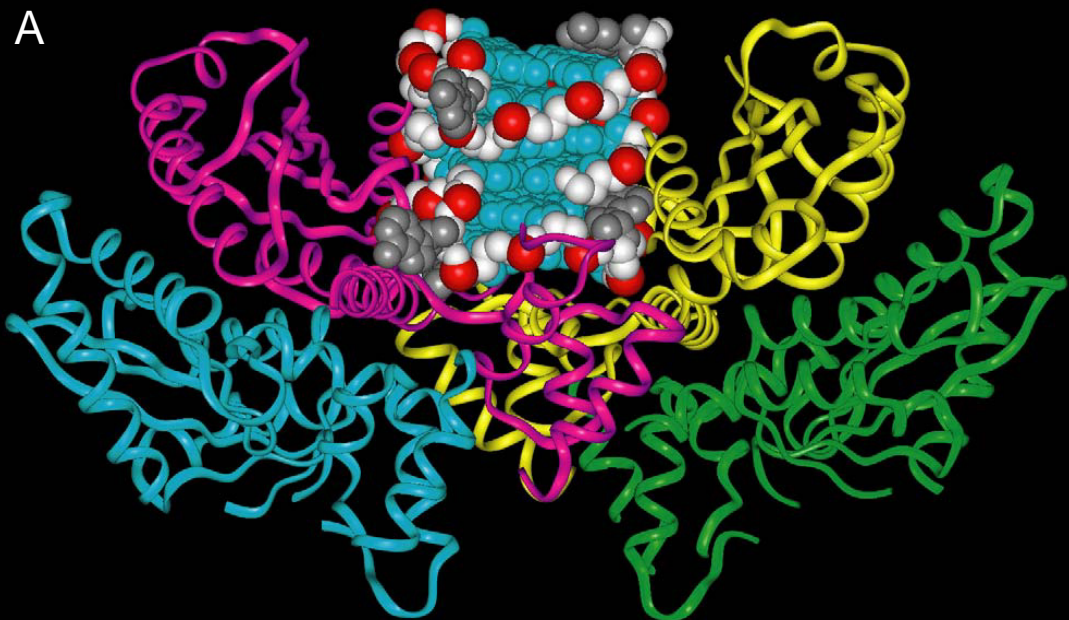**B**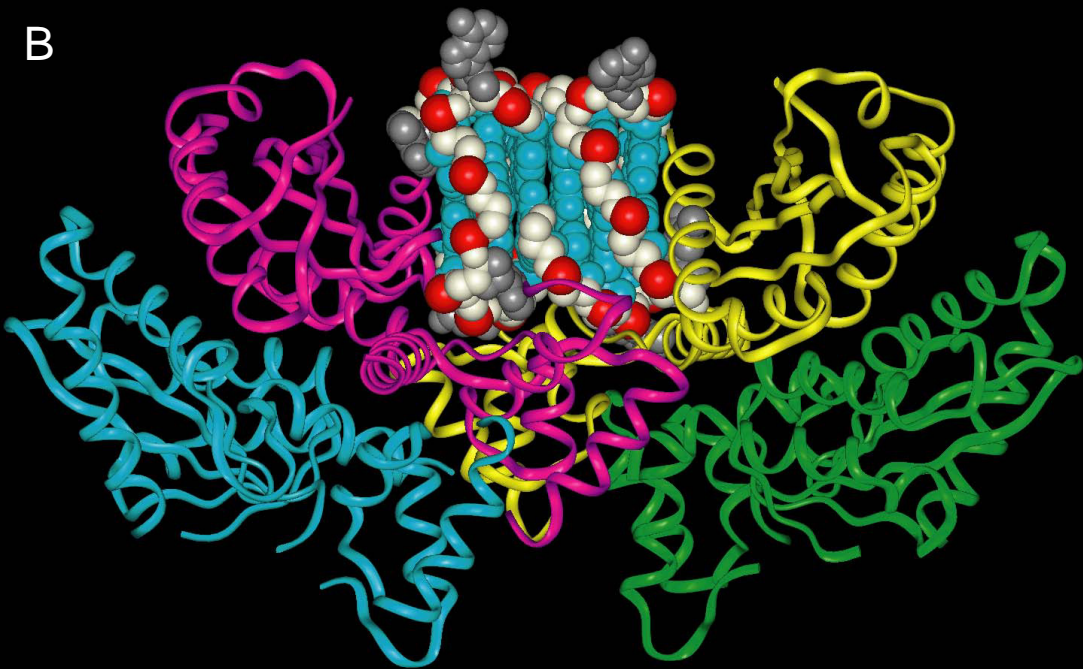

Supplement: pnas_102_3_634__11.pdf [file pnas_102_3_634__11.pdf]

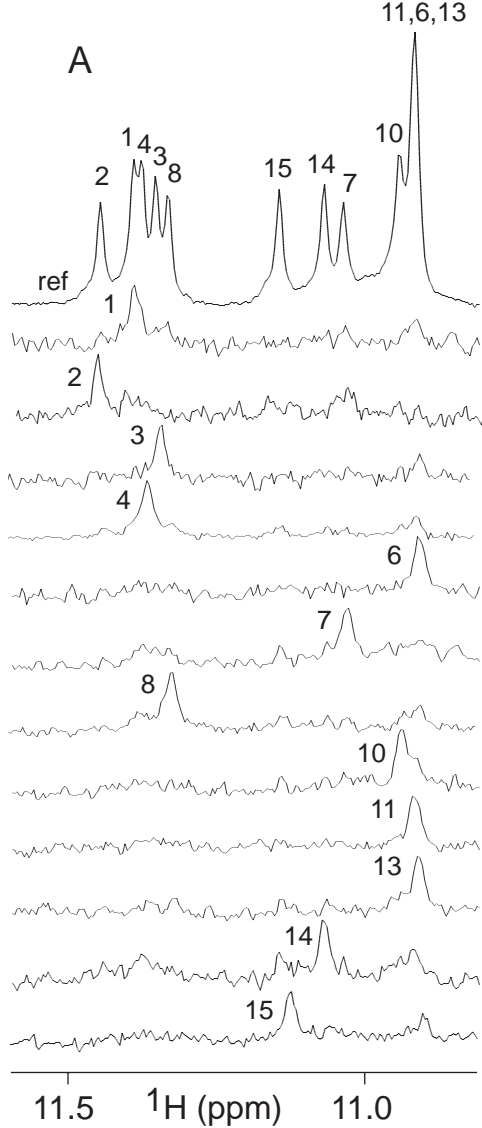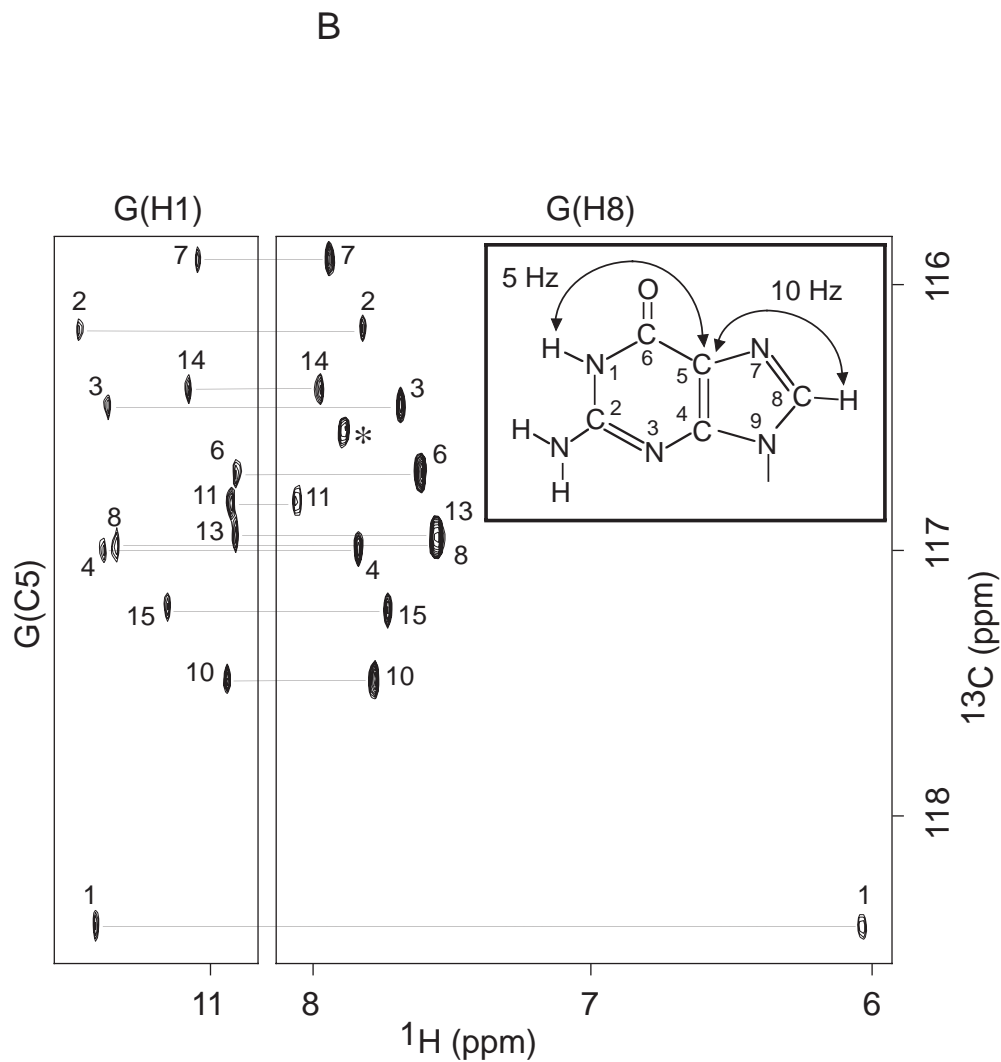

Supplement: pnas_102_3_634__2.pdf [file pnas_102_3_634__2.pdf]

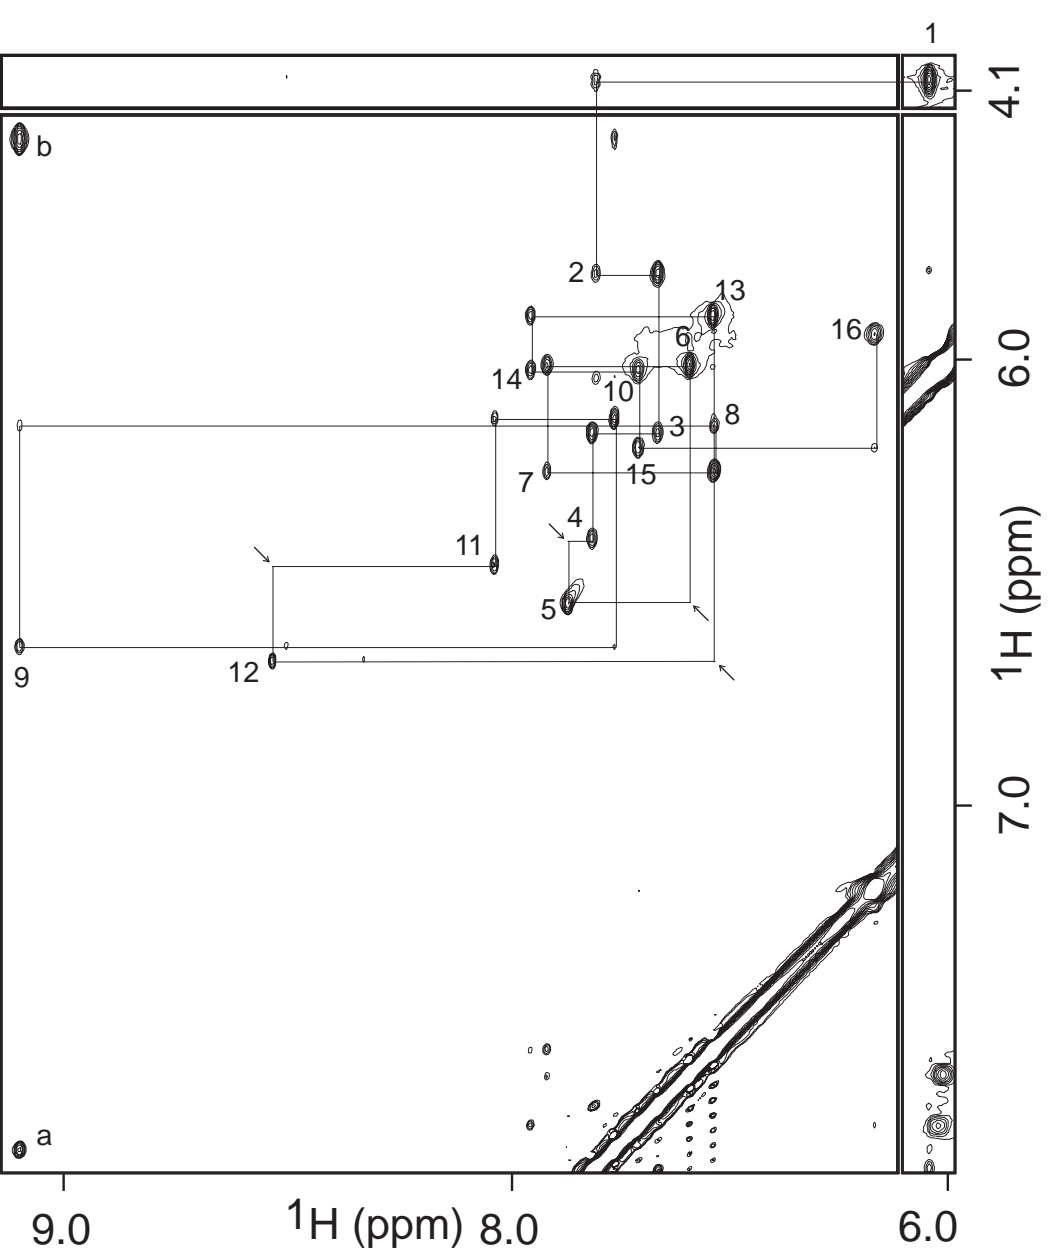

Supplement: pnas_102_3_634__3.pdf [file pnas_102_3_634__3.pdf]

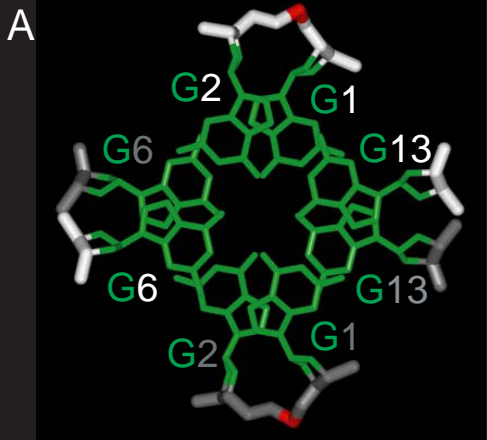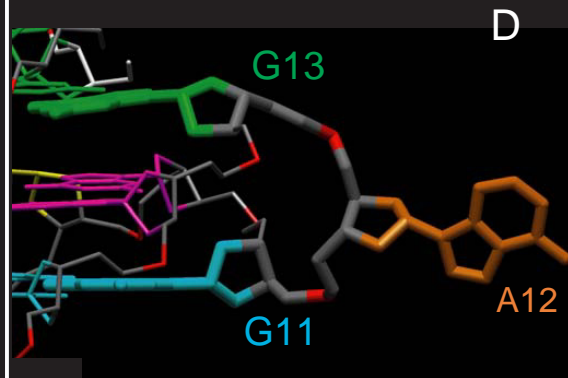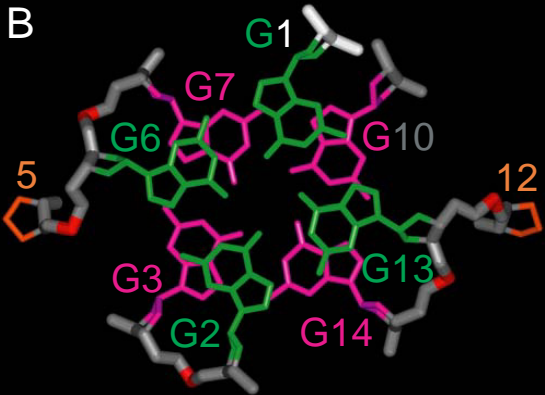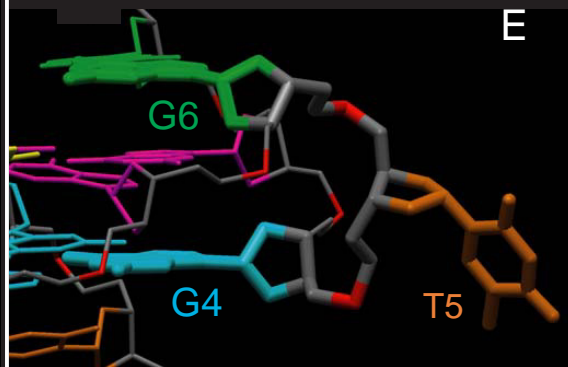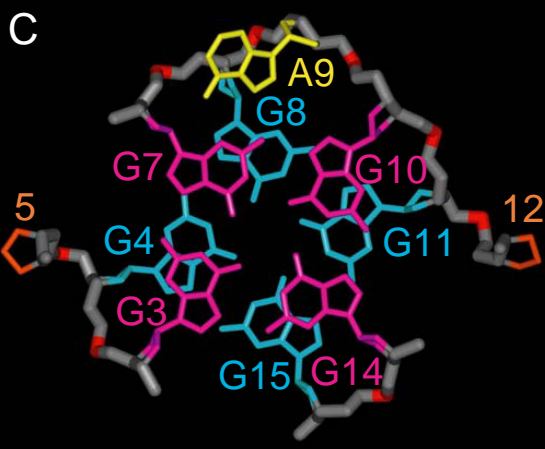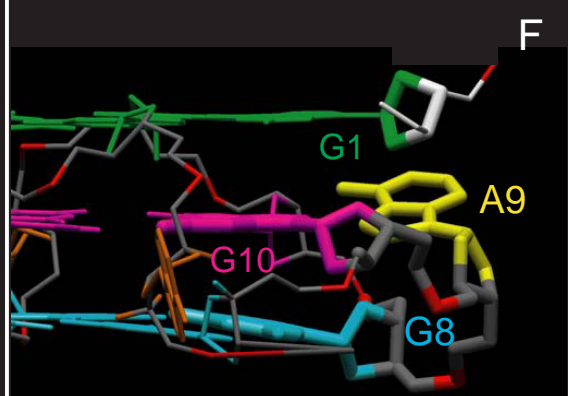

Supplement: pnas_102_3_634__5.pdf [file pnas_102_3_634__5.pdf]

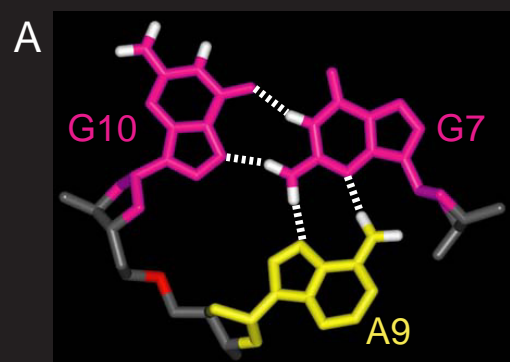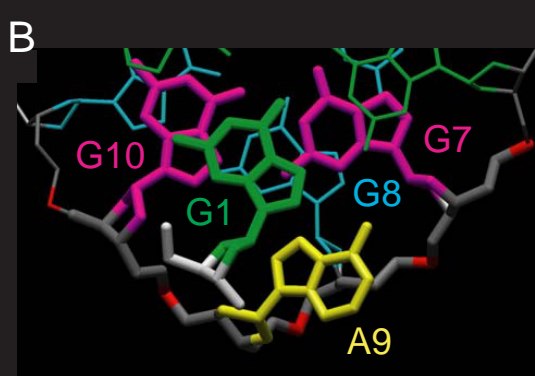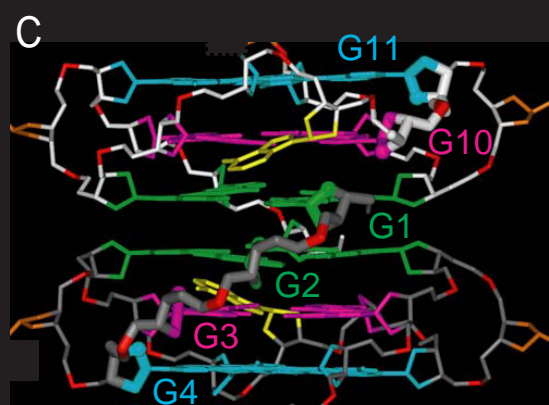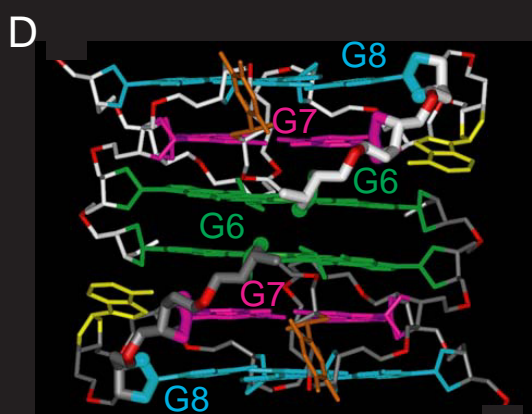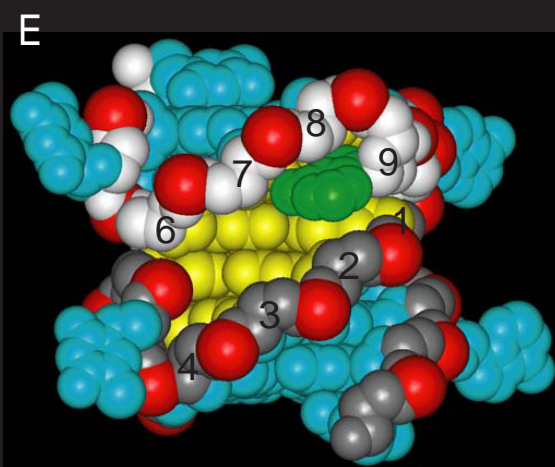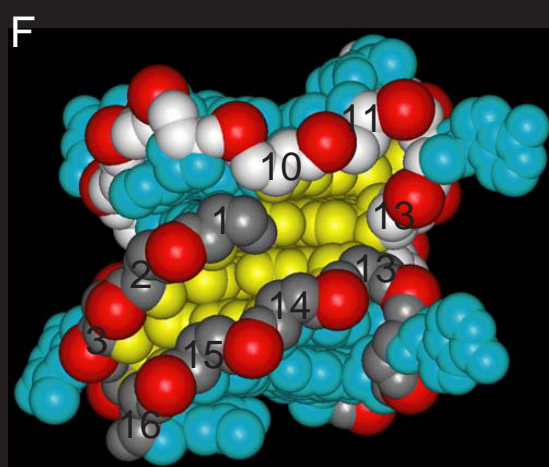

Supplement: pnas_102_3_634__6.pdf [file pnas_102_3_634__6.pdf]

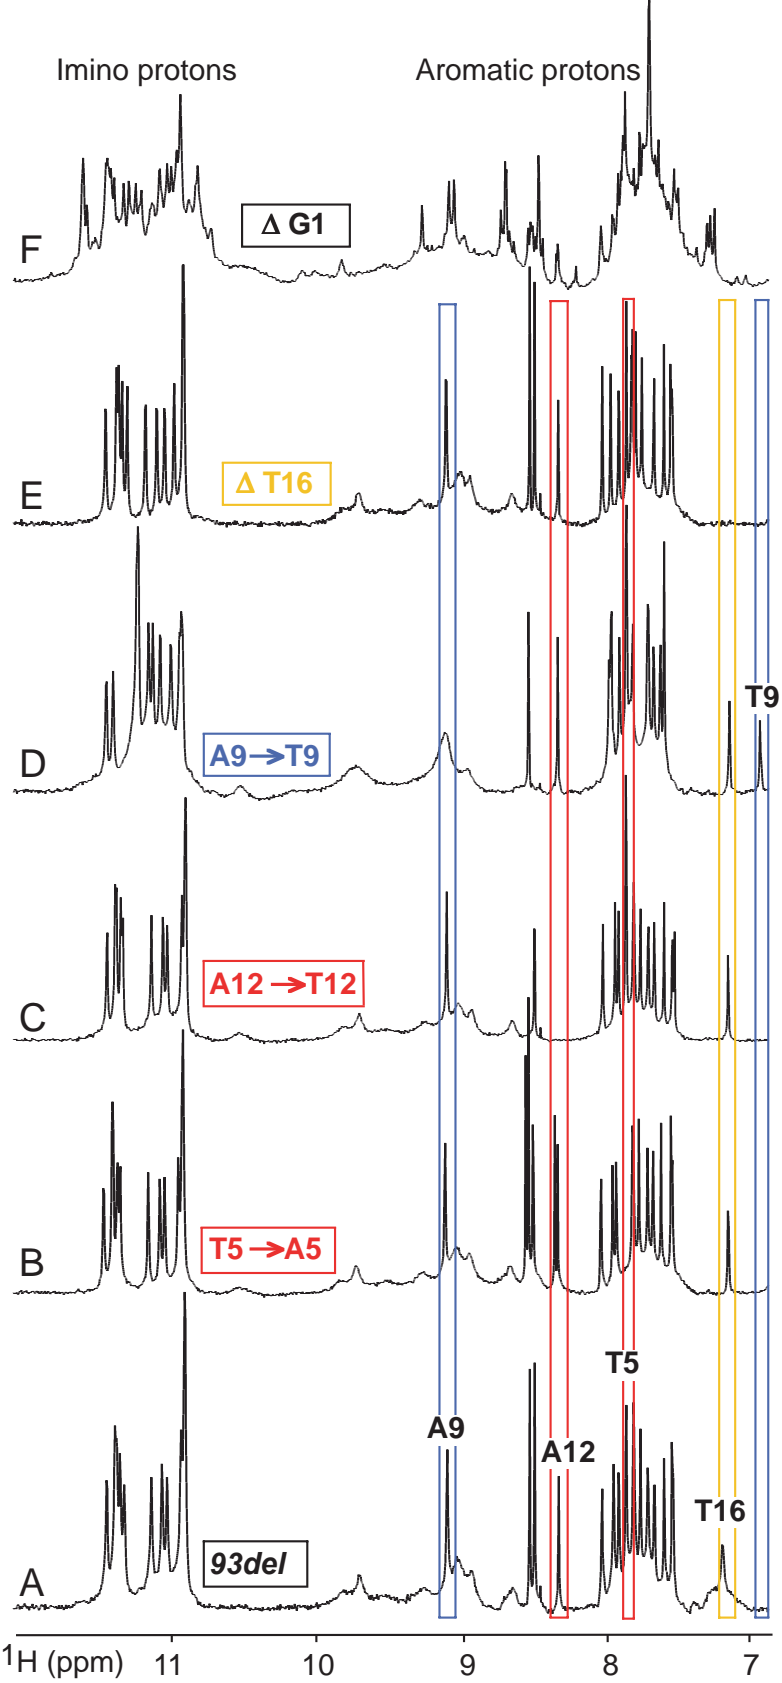

Supplement: pnas_102_3_634__8.pdf [file pnas_102_3_634__8.pdf]

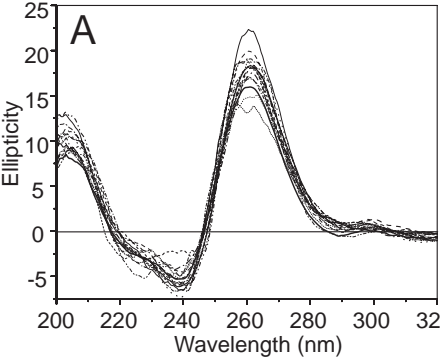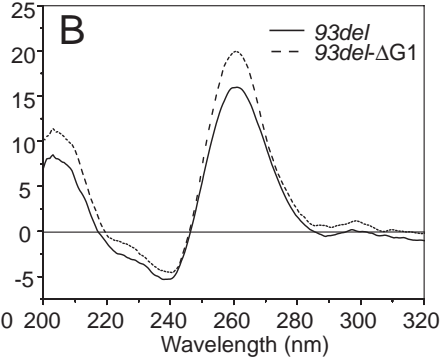

Supplement: pnas_102_3_634__9.pdf [file pnas_102_3_634__9.pdf]
